# Supplementary material for: Mitochondrial Transfer to Host Cells from Ex Vivo Expanded Donor Hematopoietic Stem Cells
Source: MDPI journal article supplement (doi:10.3390/cells12111473), 2023-05-25
Supplement: s1 [file s1]

## Supplementary Table S1

| Stem and Progenitor Cell Panel   |             |                                  |              |
|----------------------------------|-------------|----------------------------------|--------------|
| Antibody                         |             | Fluorophore                      | Clone        |
| Lineage                          |             | PerCP-Cy5.5                      |              |
|                                  | Anti-Ter119 |                                  | Ter-119      |
|                                  | Anti-Gr1    |                                  | RB6-8C5      |
|                                  | Anti-B220   |                                  | RA3-6B2      |
|                                  | Anti-CD3e   |                                  | 145-2C11     |
| Anti-CD16/32 (Fc $\gamma$ R)     |             | BV786                            | 2.4G2        |
| Anti-CD150 (SLAM)                |             | BV605                            | TC15-12F12.2 |
| Anti-Flt3                        |             | BV421                            | CD135        |
| Anti-CD48                        |             | PE-Cy7                           | 104          |
| Anti-cKit                        |             | PE-Cy5                           | 2B8          |
| Anti-Sca1                        |             | PE-CF594                         | D7           |
| Anti-CD34                        |             | PE                               | RAM34        |
| Anti-CD41                        |             | BUV395                           | MWReg30      |
| BM Mature Cell Panel             |             |                                  |              |
| Antibody                         |             | Fluorophore                      | Clone        |
| Anti-CD3e                        |             | PerCP-Cy5.5                      | 145-2C11     |
| Anti-CD45                        |             | APC-Cy7                          | 30-F11       |
| Anti-CD11b                       |             | AF700                            | M1/70        |
| Anti-CD206                       |             | AF647                            | C068C2       |
| Anti-Ly6G                        |             | BV786                            | 1A8          |
| Anti-B220                        |             | BV605                            | RA3-6B2      |
| Anti-Ly6c                        |             | PE-Cy7                           | AL-21        |
| Anti-CD4                         |             | PE-Cy5                           | RM4-5        |
| Anti-F4/80                       |             | PE-Texas Red                     | BM8          |
| Anti-CD8a                        |             | BUV395                           | 53-6.7       |
| HSC Sort Panel                   |             |                                  |              |
| Antibody                         |             | Fluorophore                      | Clone        |
| Lineage                          |             | Biotin (primary)                 |              |
|                                  | Anti-Ter119 | APC-Cy7-Streptavidin (secondary) | Ter-119      |
|                                  | Anti-Gr1    |                                  | RB6-8C5      |
|                                  | Anti-B220   |                                  | RA3-6B2      |
|                                  | Anti-CD3e   |                                  | 145-2C11     |
| Anti-cKit                        |             | APC                              | 2B8          |
| Anti-CD150 (SLAM)                |             | BV785                            | TC15-12F12.2 |
| Anti-Sca1                        |             | PE-CF594                         | D7           |
| Anti-CD11b                       |             | APC-Cy7                          | M1/70        |
|                                  |             |                                  |              |
| HSC in Vitro Quality Check Panel |             |                                  |              |
| Antibody                         |             | Fluorophore                      | Clone        |
| Anti-CD34                        |             | FITC                             |              |
| Lineage                          |             | Biotin (primary)                 |              |
|                                  | Anti-Ter119 | APC-Cy7-Streptavidin (secondary) | Ter-119      |
|                                  | Anti-Gr1    |                                  | RB6-8C5      |
|                                  | Anti-B220   |                                  | RA3-6B2      |
|                                  | Anti-CD3e   |                                  | 145-2C11     |
| Anti-cKit                        |             | APC                              | 2B8          |
| Anti-CD4                         |             | PE-Cy5                           | RM4-5        |
| Anti-CD150 (SLAM)                |             | BV785                            | TC15-12F12.2 |
| Anti-CD48                        |             | PE-Cy7                           | 104          |
| Anti-Sca1                        |             | PE-CF594                         | D7           |

### Supplementary Table S1. List of antibodies in each panel

The fluorophore and clone information of each anti-mouse antibody was provided.
